# Supplementary material
Source: PubMed Central journal article supplement (PMC2533220)
Supplement: 0806590105_0806590105SI.pdf [file 0806590105_0806590105SI.pdf]

# Supporting Information

Crean and Marshall 10.1073/pnas.0806590105

**Table S1. Factors removed from ANOVAs showing the effect on gamete traits of manipulating adult density for 1 month in the field**

| Source                             | df | Mean squares  | F     | P     |
|------------------------------------|----|---------------|-------|-------|
| <b>Total egg area</b>              |    |               |       |       |
| Treatment × Run × Adult            | 2  | 3 341 297.981 | 0.712 | 0.499 |
| Treatment × Run                    | 2  | 4 474 489.254 | 0.971 | 0.390 |
| Treatment × Adult                  | 1  | 1 205 419.574 | 0.261 | 0.613 |
| Run × Adult                        | 2  | 2 990 951.907 | 0.649 | 0.529 |
| Adult                              | 1  | 65 086.858    | 0.014 | 0.905 |
| <b>Ovicell area</b>                |    |               |       |       |
| Treatment × Run × Adult            | 2  | 669 190.425   | 0.897 | 0.419 |
| Treatment × Run                    | 2  | 579 978.614   | 0.782 | 0.466 |
| Treatment × Adult                  | 1  | 564 127.074   | 0.761 | 0.390 |
| Run × Adult                        | 2  | 202 477.213   | 0.273 | 0.763 |
| Adult                              | 1  | 159 426.441   | 0.221 | 0.641 |
| <b>Follicle cell area</b>          |    |               |       |       |
| Treatment × Run × Adult            | 2  | 1 077 406.547 | 0.448 | 0.643 |
| Treatment × Run                    | 2  | 2 966 846.863 | 1.278 | 0.292 |
| Treatment × Adult                  | 1  | 120 292.490   | 0.052 | 0.821 |
| Run × Adult                        | 2  | 2 083 775.516 | 0.898 | 0.417 |
| Adult                              | 1  | 20 782.436    | 0.009 | 0.925 |
| <b>Sperm size</b>                  |    |               |       |       |
| Treatment × Run                    | 1  | 0.166         | 1.616 | 0.218 |
| <b>Sperm motility</b>              |    |               |       |       |
| Treatment × Run                    | 1  | 640.670       | 2.689 | 0.112 |
| <b>Sperm longevity</b>             |    |               |       |       |
| Treatment × Run                    | 1  | 466.705       | 1.332 | 0.278 |
| <b>Sperm fertilization success</b> |    |               |       |       |
| Treat × Run × Sperm dilution       | 3  | 179.203       | 0.269 | 0.848 |
| Treatment × Run                    | 1  | 132.894       | 0.208 | 0.650 |
| Run × Sperm dilution               | 3  | 137.130       | 0.215 | 0.886 |

Treatment = high density (15 individuals per cage), low density (1 individual per cage); Adult = length of animal.
